# Supplementary material for: Increasing opal productivity in the late Eocene Southern Ocean: Evidence for increased carbon export preceding the Eocene-Oligocene glaciation
Source: Copernicus journal article supplement (doi:10.5194/egusphere-2025-555), 2025-02-17
Supplement: Supplementary file 2 [file egusphere-2025-555-supplement.zip]

## Description of Additional Supplementary Data

### Increasing opal productivity in the late Eocene Southern Ocean: Evidence for increased carbon export preceding the Eocene-Oligocene glaciation

Özen *et al.*

#### Southern Ocean Diatom Diversity

Represents Southern Ocean diatom diversity data from Özen *et al.*, (subm. 2025 to The Journal of Micropaleontology). The column names and their meanings are as follows:

|               |                                                       |
|---------------|-------------------------------------------------------|
| rawdiv        | : Raw diversity (observed diversity)                  |
| chao1         | : Chao1 estimation                                    |
| lci:          | : Lower confidence (95%) interval of Chao1 estimation |
| uci           | : Upper confidence (95%) interval of Chao1 estimation |
| sample_age_ma | : Sample age in Ma                                    |

#### Southern Ocean Diatom MAR

Compiles diatom, radiolarian, and ebridians (only for ODP 748B) raw counts, estimated absolute abundance (See Methods, equation 1, also below), and accumulation rates.

$$ab = N \times \left( \frac{Ab}{Am} \right) \times \left( \frac{Vp}{Vu} \right) \times \frac{1}{w}$$

The area of used beaker (**6079 mm<sup>2</sup>**) : **Ab**

Correspondence between column names in the dataset ('SO\_diatom\_MAR.csv') and symbols used in the equation:

|                     |                        |
|---------------------|------------------------|
| diatoms_counted     | : N (for diatoms)      |
| radiolarian_counted | : N (for radiolarians) |
| ebridians_counted   | : N (for ebridians)    |

|                                  |             |
|----------------------------------|-------------|
| diatom_slides_volume_used        | : <b>Vu</b> |
| diatom_slides_volume_total       | : <b>Vp</b> |
| diatom_slides_mass_seds_prepared | : <b>w</b>  |
| diatom_slides_area_counted       | : <b>Am</b> |
| diatoms_per_g                    | : <b>ab</b> |
